# Supplementary material for: Identification of Candidate Biomarkers Correlated With the Pathogenesis and Prognosis of Non-small Cell Lung Cancer via Integrated Bioinformatics Analysis
Source: Front Genet. 2018 Oct 12;9:469. doi: 10.3389/fgene.2018.00469 (PMC6194157; doi:10.3389/fgene.2018.00469)
Supplement: Supplementary file 1 [file Table_1.XLSX]

## Sheet: Sheet1
Table S1 Information for samples in the included datasets. (GEO datasets)
Dataset	Sample GEO accession	Sample platform id	Age	Gender	Stage	Grade	Tissue type	Sample contact country
GSE19804	GSM494556	GPL570	55	female	1A	unknown	lung cancer	Taiwan
GSE19804	GSM494557	GPL570	76	female	2A	unknown	lung cancer	Taiwan
GSE19804	GSM494558	GPL570	54	female	1A	unknown	lung cancer	Taiwan
GSE19804	GSM494559	GPL570	55	female	2B	unknown	lung cancer	Taiwan
GSE19804	GSM494560	GPL570	65	female	3A	unknown	lung cancer	Taiwan
GSE19804	GSM494561	GPL570	69	female	1A	unknown	lung cancer	Taiwan
GSE19804	GSM494562	GPL570	57	female	3A	unknown	lung cancer	Taiwan
GSE19804	GSM494563	GPL570	61	female	1B	unknown	lung cancer	Taiwan
GSE19804	GSM494564	GPL570	44	female	1B	unknown	lung cancer	Taiwan
GSE19804	GSM494565	GPL570	37	female	1B	unknown	lung cancer	Taiwan
GSE19804	GSM494566	GPL570	76	female	1A	unknown	lung cancer	Taiwan
GSE19804	GSM494567	GPL570	48	female	1B	unknown	lung cancer	Taiwan
GSE19804	GSM494568	GPL570	56	female	1A	unknown	lung cancer	Taiwan
GSE19804	GSM494569	GPL570	69	female	1A	unknown	lung cancer	Taiwan
GSE19804	GSM494570	GPL570	67	female	3B	unknown	lung cancer	Taiwan
GSE19804	GSM494571	GPL570	55	female	4	unknown	lung cancer	Taiwan
GSE19804	GSM494572	GPL570	57	female	2B	unknown	lung cancer	Taiwan
GSE19804	GSM494573	GPL570	74	female	3B	unknown	lung cancer	Taiwan
GSE19804	GSM494574	GPL570	74	female	1B	unknown	lung cancer	Taiwan
GSE19804	GSM494575	GPL570	80	female	1B	unknown	lung cancer	Taiwan
GSE19804	GSM494576	GPL570	61	female	3A	unknown	lung cancer	Taiwan
GSE19804	GSM494577	GPL570	70	female	3A	unknown	lung cancer	Taiwan
GSE19804	GSM494578	GPL570	63	female	1A	unknown	lung cancer	Taiwan
GSE19804	GSM494579	GPL570	76	female	2B	unknown	lung cancer	Taiwan
GSE19804	GSM494580	GPL570	61	female	1A	unknown	lung cancer	Taiwan
GSE19804	GSM494581	GPL570	60	female	1B	unknown	lung cancer	Taiwan
GSE19804	GSM494582	GPL570	59	female	1B	unknown	lung cancer	Taiwan
GSE19804	GSM494583	GPL570	53	female	1B	unknown	lung cancer	Taiwan
GSE19804	GSM494584	GPL570	62	female	1B	unknown	lung cancer	Taiwan
GSE19804	GSM494585	GPL570	64	female	2A	unknown	lung cancer	Taiwan
GSE19804	GSM494586	GPL570	62	female	2B	unknown	lung cancer	Taiwan
GSE19804	GSM494587	GPL570	59	female	3A	unknown	lung cancer	Taiwan
GSE19804	GSM494588	GPL570	71	female	1A	unknown	lung cancer	Taiwan
GSE19804	GSM494589	GPL570	51	female	2A	unknown	lung cancer	Taiwan
GSE19804	GSM494590	GPL570	71	female	1B	unknown	lung cancer	Taiwan
GSE19804	GSM494591	GPL570	47	female	1B	unknown	lung cancer	Taiwan
GSE19804	GSM494592	GPL570	70	female	1B	unknown	lung cancer	Taiwan
GSE19804	GSM494593	GPL570	52	female	2B	unknown	lung cancer	Taiwan
GSE19804	GSM494594	GPL570	39	female	1A	unknown	lung cancer	Taiwan
GSE19804	GSM494595	GPL570	65	female	3B	unknown	lung cancer	Taiwan
GSE19804	GSM494596	GPL570	79	female	1A	unknown	lung cancer	Taiwan
GSE19804	GSM494597	GPL570	68	female	1B	unknown	lung cancer	Taiwan
GSE19804	GSM494598	GPL570	51	female	3A	unknown	lung cancer	Taiwan
GSE19804	GSM494599	GPL570	59	female	1B	unknown	lung cancer	Taiwan
GSE19804	GSM494600	GPL570	57	female	3A	unknown	lung cancer	Taiwan
GSE19804	GSM494601	GPL570	76	female	1B	unknown	lung cancer	Taiwan
GSE19804	GSM494602	GPL570	48	female	3A	unknown	lung cancer	Taiwan
GSE19804	GSM494603	GPL570	56	female	1A	unknown	lung cancer	Taiwan
GSE19804	GSM494604	GPL570	42	female	2A	unknown	lung cancer	Taiwan
GSE19804	GSM494605	GPL570	62	female	1A	unknown	lung cancer	Taiwan
GSE19804	GSM494606	GPL570	73	female	1B	unknown	lung cancer	Taiwan
GSE19804	GSM494607	GPL570	68	female	1B	unknown	lung cancer	Taiwan
GSE19804	GSM494608	GPL570	73	female	1A	unknown	lung cancer	Taiwan
GSE19804	GSM494609	GPL570	72	female	2B	unknown	lung cancer	Taiwan
GSE19804	GSM494610	GPL570	59	female	1B	unknown	lung cancer	Taiwan
GSE19804	GSM494611	GPL570	64	female	3B	unknown	lung cancer	Taiwan
GSE19804	GSM494612	GPL570	53	female	2B	unknown	lung cancer	Taiwan
GSE19804	GSM494613	GPL570	50	female	2	unknown	lung cancer	Taiwan
GSE19804	GSM494614	GPL570	55	female	1	unknown	lung cancer	Taiwan
GSE19804	GSM494615	GPL570	59	female	1A	unknown	lung cancer	Taiwan
GSE19804	GSM494616	GPL570	55	female	n/a	unknown	paired normal	Taiwan
GSE19804	GSM494617	GPL570	76	female	n/a	unknown	paired normal	Taiwan
GSE19804	GSM494618	GPL570	54	female	n/a	unknown	paired normal	Taiwan
GSE19804	GSM494619	GPL570	55	female	n/a	unknown	paired normal	Taiwan
GSE19804	GSM494620	GPL570	65	female	n/a	unknown	paired normal	Taiwan
GSE19804	GSM494621	GPL570	69	female	n/a	unknown	paired normal	Taiwan
GSE19804	GSM494622	GPL570	57	female	n/a	unknown	paired normal	Taiwan
GSE19804	GSM494623	GPL570	61	female	n/a	unknown	paired normal	Taiwan
GSE19804	GSM494624	GPL570	44	female	n/a	unknown	paired normal	Taiwan
GSE19804	GSM494625	GPL570	37	female	n/a	unknown	paired normal	Taiwan
GSE19804	GSM494626	GPL570	76	female	n/a	unknown	paired normal	Taiwan
GSE19804	GSM494627	GPL570	48	female	n/a	unknown	paired normal	Taiwan
GSE19804	GSM494628	GPL570	56	female	n/a	unknown	paired normal	Taiwan
GSE19804	GSM494629	GPL570	69	female	n/a	unknown	paired normal	Taiwan
GSE19804	GSM494630	GPL570	67	female	n/a	unknown	paired normal	Taiwan
GSE19804	GSM494631	GPL570	55	female	n/a	unknown	paired normal	Taiwan
GSE19804	GSM494632	GPL570	57	female	n/a	unknown	paired normal	Taiwan
GSE19804	GSM494633	GPL570	74	female	n/a	unknown	paired normal	Taiwan
GSE19804	GSM494634	GPL570	74	female	n/a	unknown	paired normal	Taiwan
GSE19804	GSM494635	GPL570	80	female	n/a	unknown	paired normal	Taiwan
GSE19804	GSM494636	GPL570	61	female	n/a	unknown	paired normal	Taiwan
GSE19804	GSM494637	GPL570	70	female	n/a	unknown	paired normal	Taiwan
GSE19804	GSM494638	GPL570	63	female	n/a	unknown	paired normal	Taiwan
GSE19804	GSM494639	GPL570	76	female	n/a	unknown	paired normal	Taiwan
GSE19804	GSM494640	GPL570	61	female	n/a	unknown	paired normal	Taiwan
GSE19804	GSM494641	GPL570	60	female	n/a	unknown	paired normal	Taiwan
GSE19804	GSM494642	GPL570	59	female	n/a	unknown	paired normal	Taiwan
GSE19804	GSM494643	GPL570	53	female	n/a	unknown	paired normal	Taiwan
GSE19804	GSM494644	GPL570	62	female	n/a	unknown	paired normal	Taiwan
GSE19804	GSM494645	GPL570	64	female	n/a	unknown	paired normal	Taiwan
GSE19804	GSM494646	GPL570	62	female	n/a	unknown	paired normal	Taiwan
GSE19804	GSM494647	GPL570	59	female	n/a	unknown	paired normal	Taiwan
GSE19804	GSM494648	GPL570	71	female	n/a	unknown	paired normal	Taiwan
GSE19804	GSM494649	GPL570	51	female	n/a	unknown	paired normal	Taiwan
GSE19804	GSM494650	GPL570	71	female	n/a	unknown	paired normal	Taiwan
GSE19804	GSM494651	GPL570	47	female	n/a	unknown	paired normal	Taiwan
GSE19804	GSM494652	GPL570	70	female	n/a	unknown	paired normal	Taiwan
GSE19804	GSM494653	GPL570	52	female	n/a	unknown	paired normal	Taiwan
GSE19804	GSM494654	GPL570	39	female	n/a	unknown	paired normal	Taiwan
GSE19804	GSM494655	GPL570	65	female	n/a	unknown	paired normal	Taiwan
GSE19804	GSM494656	GPL570	79	female	n/a	unknown	paired normal	Taiwan
GSE19804	GSM494657	GPL570	68	female	n/a	unknown	paired normal	Taiwan
GSE19804	GSM494658	GPL570	51	female	n/a	unknown	paired normal	Taiwan
GSE19804	GSM494659	GPL570	59	female	n/a	unknown	paired normal	Taiwan
GSE19804	GSM494660	GPL570	57	female	n/a	unknown	paired normal	Taiwan
GSE19804	GSM494661	GPL570	76	female	n/a	unknown	paired normal	Taiwan
GSE19804	GSM494662	GPL570	48	female	n/a	unknown	paired normal	Taiwan
GSE19804	GSM494663	GPL570	56	female	n/a	unknown	paired normal	Taiwan
GSE19804	GSM494664	GPL570	42	female	n/a	unknown	paired normal	Taiwan
GSE19804	GSM494665	GPL570	62	female	n/a	unknown	paired normal	Taiwan
GSE19804	GSM494666	GPL570	73	female	n/a	unknown	paired normal	Taiwan
GSE19804	GSM494667	GPL570	68	female	n/a	unknown	paired normal	Taiwan
GSE19804	GSM494668	GPL570	73	female	n/a	unknown	paired normal	Taiwan
GSE19804	GSM494669	GPL570	72	female	n/a	unknown	paired normal	Taiwan
GSE19804	GSM494670	GPL570	59	female	n/a	unknown	paired normal	Taiwan
GSE19804	GSM494671	GPL570	64	female	n/a	unknown	paired normal	Taiwan
GSE19804	GSM494672	GPL570	53	female	n/a	unknown	paired normal	Taiwan
GSE19804	GSM494673	GPL570	50	female	n/a	unknown	paired normal	Taiwan
GSE19804	GSM494674	GPL570	55	female	n/a	unknown	paired normal	Taiwan
GSE19804	GSM494675	GPL570	59	female	n/a	unknown	paired normal	Taiwan
GSE18842	GSM466947	GPL570	unknown	unknown	unknown	unknown	tumor	Spain
GSE18842	GSM466948	GPL570	unknown	unknown	unknown	unknown	control	Spain
GSE18842	GSM466949	GPL570	unknown	unknown	unknown	unknown	tumor	Spain
GSE18842	GSM466950	GPL570	unknown	unknown	unknown	unknown	control	Spain
GSE18842	GSM466951	GPL570	unknown	unknown	unknown	unknown	tumor	Spain
GSE18842	GSM466952	GPL570	unknown	unknown	unknown	unknown	tumor	Spain
GSE18842	GSM466953	GPL570	unknown	unknown	unknown	unknown	control	Spain
GSE18842	GSM466954	GPL570	unknown	unknown	unknown	unknown	tumor	Spain
GSE18842	GSM466955	GPL570	unknown	unknown	unknown	unknown	control	Spain
GSE18842	GSM466956	GPL570	unknown	unknown	unknown	unknown	tumor	Spain
GSE18842	GSM466957	GPL570	unknown	unknown	unknown	unknown	control	Spain
GSE18842	GSM466958	GPL570	unknown	unknown	unknown	unknown	tumor	Spain
GSE18842	GSM466959	GPL570	unknown	unknown	unknown	unknown	control	Spain
GSE18842	GSM466960	GPL570	unknown	unknown	unknown	unknown	tumor	Spain
GSE18842	GSM466961	GPL570	unknown	unknown	unknown	unknown	control	Spain
GSE18842	GSM466962	GPL570	unknown	unknown	unknown	unknown	tumor	Spain
GSE18842	GSM466963	GPL570	unknown	unknown	unknown	unknown	tumor	Spain
GSE18842	GSM466964	GPL570	unknown	unknown	unknown	unknown	control	Spain
GSE18842	GSM466965	GPL570	unknown	unknown	unknown	unknown	tumor	Spain
GSE18842	GSM466966	GPL570	unknown	unknown	unknown	unknown	control	Spain
GSE18842	GSM466967	GPL570	unknown	unknown	unknown	unknown	tumor	Spain
GSE18842	GSM466968	GPL570	unknown	unknown	unknown	unknown	control	Spain
GSE18842	GSM466969	GPL570	unknown	unknown	unknown	unknown	tumor	Spain
GSE18842	GSM466970	GPL570	unknown	unknown	unknown	unknown	control	Spain
GSE18842	GSM466971	GPL570	unknown	unknown	unknown	unknown	tumor	Spain
GSE18842	GSM466972	GPL570	unknown	unknown	unknown	unknown	control	Spain
GSE18842	GSM466973	GPL570	unknown	unknown	unknown	unknown	tumor	Spain
GSE18842	GSM466974	GPL570	unknown	unknown	unknown	unknown	control	Spain
GSE18842	GSM466975	GPL570	unknown	unknown	unknown	unknown	tumor	Spain
GSE18842	GSM466976	GPL570	unknown	unknown	unknown	unknown	control	Spain
GSE18842	GSM466977	GPL570	unknown	unknown	unknown	unknown	tumor	Spain
GSE18842	GSM466978	GPL570	unknown	unknown	unknown	unknown	control	Spain
GSE18842	GSM466979	GPL570	unknown	unknown	unknown	unknown	control	Spain
GSE18842	GSM466980	GPL570	unknown	unknown	unknown	unknown	tumor	Spain
GSE18842	GSM466981	GPL570	unknown	unknown	unknown	unknown	control	Spain
GSE18842	GSM466982	GPL570	unknown	unknown	unknown	unknown	tumor	Spain
GSE18842	GSM466983	GPL570	unknown	unknown	unknown	unknown	tumor	Spain
GSE18842	GSM466984	GPL570	unknown	unknown	unknown	unknown	control	Spain
GSE18842	GSM466985	GPL570	unknown	unknown	unknown	unknown	tumor	Spain
GSE18842	GSM466986	GPL570	unknown	unknown	unknown	unknown	control	Spain
GSE18842	GSM466987	GPL570	unknown	unknown	unknown	unknown	tumor	Spain
GSE18842	GSM466988	GPL570	unknown	unknown	unknown	unknown	control	Spain
GSE18842	GSM466989	GPL570	unknown	unknown	unknown	unknown	tumor	Spain
GSE18842	GSM466990	GPL570	unknown	unknown	unknown	unknown	control	Spain
GSE18842	GSM466991	GPL570	unknown	unknown	unknown	unknown	tumor	Spain
GSE18842	GSM466992	GPL570	unknown	unknown	unknown	unknown	control	Spain
GSE18842	GSM466993	GPL570	unknown	unknown	unknown	unknown	tumor	Spain
GSE18842	GSM466994	GPL570	unknown	unknown	unknown	unknown	tumor	Spain
GSE18842	GSM466995	GPL570	unknown	unknown	unknown	unknown	control	Spain
GSE18842	GSM466996	GPL570	unknown	unknown	unknown	unknown	tumor	Spain
GSE18842	GSM466997	GPL570	unknown	unknown	unknown	unknown	control	Spain
GSE18842	GSM466998	GPL570	unknown	unknown	unknown	unknown	tumor	Spain
GSE18842	GSM466999	GPL570	unknown	unknown	unknown	unknown	control	Spain
GSE18842	GSM467000	GPL570	unknown	unknown	unknown	unknown	control	Spain
GSE18842	GSM467001	GPL570	unknown	unknown	unknown	unknown	control	Spain
GSE18842	GSM467002	GPL570	unknown	unknown	unknown	unknown	control	Spain
GSE18842	GSM467003	GPL570	unknown	unknown	unknown	unknown	control	Spain
GSE18842	GSM467004	GPL570	unknown	unknown	unknown	unknown	tumor	Spain
GSE18842	GSM467005	GPL570	unknown	unknown	unknown	unknown	control	Spain
GSE18842	GSM467006	GPL570	unknown	unknown	unknown	unknown	tumor	Spain
GSE18842	GSM467007	GPL570	unknown	unknown	unknown	unknown	control	Spain
GSE18842	GSM467008	GPL570	unknown	unknown	unknown	unknown	tumor	Spain
GSE18842	GSM467009	GPL570	unknown	unknown	unknown	unknown	control	Spain
GSE18842	GSM467010	GPL570	unknown	unknown	unknown	unknown	tumor	Spain
GSE18842	GSM467011	GPL570	unknown	unknown	unknown	unknown	control	Spain
GSE18842	GSM467012	GPL570	unknown	unknown	unknown	unknown	tumor	Spain
GSE18842	GSM467013	GPL570	unknown	unknown	unknown	unknown	control	Spain
GSE18842	GSM467014	GPL570	unknown	unknown	unknown	unknown	tumor	Spain
GSE18842	GSM467015	GPL570	unknown	unknown	unknown	unknown	control	Spain
GSE18842	GSM467016	GPL570	unknown	unknown	unknown	unknown	tumor	Spain
GSE18842	GSM467017	GPL570	unknown	unknown	unknown	unknown	control	Spain
GSE18842	GSM467018	GPL570	unknown	unknown	unknown	unknown	tumor	Spain
GSE18842	GSM467019	GPL570	unknown	unknown	unknown	unknown	control	Spain
GSE18842	GSM467020	GPL570	unknown	unknown	unknown	unknown	control	Spain
GSE18842	GSM467021	GPL570	unknown	unknown	unknown	unknown	tumor	Spain
GSE18842	GSM467022	GPL570	unknown	unknown	unknown	unknown	control	Spain
GSE18842	GSM467023	GPL570	unknown	unknown	unknown	unknown	tumor	Spain
GSE18842	GSM467024	GPL570	unknown	unknown	unknown	unknown	tumor	Spain
GSE18842	GSM467025	GPL570	unknown	unknown	unknown	unknown	control	Spain
GSE18842	GSM467026	GPL570	unknown	unknown	unknown	unknown	tumor	Spain
GSE18842	GSM467027	GPL570	unknown	unknown	unknown	unknown	control	Spain
GSE18842	GSM467028	GPL570	unknown	unknown	unknown	unknown	tumor	Spain
GSE18842	GSM467029	GPL570	unknown	unknown	unknown	unknown	tumor	Spain
GSE18842	GSM467030	GPL570	unknown	unknown	unknown	unknown	tumor	Spain
GSE18842	GSM467031	GPL570	unknown	unknown	unknown	unknown	control	Spain
GSE18842	GSM467032	GPL570	unknown	unknown	unknown	unknown	tumor	Spain
GSE18842	GSM467033	GPL570	unknown	unknown	unknown	unknown	control	Spain
GSE18842	GSM467034	GPL570	unknown	unknown	unknown	unknown	tumor	Spain
GSE18842	GSM467035	GPL570	unknown	unknown	unknown	unknown	control	Spain
GSE18842	GSM467036	GPL570	unknown	unknown	unknown	unknown	tumor	Spain
GSE18842	GSM467037	GPL570	unknown	unknown	unknown	unknown	control	Spain
GSE43458	GSM1062765	GPL6244	unknown	unknown	unknown	unknown	Lung tumor	USA
GSE43458	GSM1062766	GPL6244	unknown	unknown	unknown	unknown	Lung tumor	USA
GSE43458	GSM1062767	GPL6244	unknown	unknown	unknown	unknown	Lung tumor	USA
GSE43458	GSM1062768	GPL6244	unknown	unknown	unknown	unknown	Lung tumor	USA
GSE43458	GSM1062769	GPL6244	unknown	unknown	unknown	unknown	Lung tumor	USA
GSE43458	GSM1062770	GPL6244	unknown	unknown	unknown	unknown	Lung tumor	USA
GSE43458	GSM1062771	GPL6244	unknown	unknown	unknown	unknown	Lung tumor	USA
GSE43458	GSM1062772	GPL6244	unknown	unknown	unknown	unknown	Lung tumor	USA
GSE43458	GSM1062773	GPL6244	unknown	unknown	unknown	unknown	Lung tumor	USA
GSE43458	GSM1062774	GPL6244	unknown	unknown	unknown	unknown	Lung tumor	USA
GSE43458	GSM1062775	GPL6244	unknown	unknown	unknown	unknown	Lung tumor	USA
GSE43458	GSM1062776	GPL6244	unknown	unknown	unknown	unknown	Lung tumor	USA
GSE43458	GSM1062777	GPL6244	unknown	unknown	unknown	unknown	Lung tumor	USA
GSE43458	GSM1062778	GPL6244	unknown	unknown	unknown	unknown	Lung tumor	USA
GSE43458	GSM1062779	GPL6244	unknown	unknown	unknown	unknown	Lung tumor	USA
GSE43458	GSM1062780	GPL6244	unknown	unknown	unknown	unknown	Lung tumor	USA
GSE43458	GSM1062781	GPL6244	unknown	unknown	unknown	unknown	Lung tumor	USA
GSE43458	GSM1062782	GPL6244	unknown	unknown	unknown	unknown	Lung tumor	USA
GSE43458	GSM1062783	GPL6244	unknown	unknown	unknown	unknown	Lung tumor	USA
GSE43458	GSM1062784	GPL6244	unknown	unknown	unknown	unknown	Lung tumor	USA
GSE43458	GSM1062785	GPL6244	unknown	unknown	unknown	unknown	Lung tumor	USA
GSE43458	GSM1062786	GPL6244	unknown	unknown	unknown	unknown	Lung tumor	USA
GSE43458	GSM1062787	GPL6244	unknown	unknown	unknown	unknown	Lung tumor	USA
GSE43458	GSM1062788	GPL6244	unknown	unknown	unknown	unknown	Lung tumor	USA
GSE43458	GSM1062789	GPL6244	unknown	unknown	unknown	unknown	Lung tumor	USA
GSE43458	GSM1062790	GPL6244	unknown	unknown	unknown	unknown	Lung tumor	USA
GSE43458	GSM1062791	GPL6244	unknown	unknown	unknown	unknown	Lung tumor	USA
GSE43458	GSM1062792	GPL6244	unknown	unknown	unknown	unknown	Lung tumor	USA
GSE43458	GSM1062793	GPL6244	unknown	unknown	unknown	unknown	Lung tumor	USA
GSE43458	GSM1062794	GPL6244	unknown	unknown	unknown	unknown	Lung tumor	USA
GSE43458	GSM1062795	GPL6244	unknown	unknown	unknown	unknown	Lung tumor	USA
GSE43458	GSM1062796	GPL6244	unknown	unknown	unknown	unknown	Lung tumor	USA
GSE43458	GSM1062797	GPL6244	unknown	unknown	unknown	unknown	Lung tumor	USA
GSE43458	GSM1062798	GPL6244	unknown	unknown	unknown	unknown	Lung tumor	USA
GSE43458	GSM1062799	GPL6244	unknown	unknown	unknown	unknown	Lung tumor	USA
GSE43458	GSM1062800	GPL6244	unknown	unknown	unknown	unknown	Lung tumor	USA
GSE43458	GSM1062801	GPL6244	unknown	unknown	unknown	unknown	Lung tumor	USA
GSE43458	GSM1062802	GPL6244	unknown	unknown	unknown	unknown	Lung tumor	USA
GSE43458	GSM1062803	GPL6244	unknown	unknown	unknown	unknown	Lung tumor	USA
GSE43458	GSM1062804	GPL6244	unknown	unknown	unknown	unknown	Lung tumor	USA
GSE43458	GSM1062805	GPL6244	unknown	unknown	unknown	unknown	Normal lung	USA
GSE43458	GSM1062806	GPL6244	unknown	unknown	unknown	unknown	Normal lung	USA
GSE43458	GSM1062807	GPL6244	unknown	unknown	unknown	unknown	Normal lung	USA
GSE43458	GSM1062808	GPL6244	unknown	unknown	unknown	unknown	Normal lung	USA
GSE43458	GSM1062809	GPL6244	unknown	unknown	unknown	unknown	Normal lung	USA
GSE43458	GSM1062810	GPL6244	unknown	unknown	unknown	unknown	Normal lung	USA
GSE43458	GSM1062811	GPL6244	unknown	unknown	unknown	unknown	Normal lung	USA
GSE43458	GSM1062812	GPL6244	unknown	unknown	unknown	unknown	Normal lung	USA
GSE43458	GSM1062813	GPL6244	unknown	unknown	unknown	unknown	Normal lung	USA
GSE43458	GSM1062814	GPL6244	unknown	unknown	unknown	unknown	Normal lung	USA
GSE43458	GSM1062815	GPL6244	unknown	unknown	unknown	unknown	Normal lung	USA
GSE43458	GSM1062816	GPL6244	unknown	unknown	unknown	unknown	Normal lung	USA
GSE43458	GSM1062817	GPL6244	unknown	unknown	unknown	unknown	Normal lung	USA
GSE43458	GSM1062818	GPL6244	unknown	unknown	unknown	unknown	Normal lung	USA
GSE43458	GSM1062819	GPL6244	unknown	unknown	unknown	unknown	Normal lung	USA
GSE43458	GSM1062820	GPL6244	unknown	unknown	unknown	unknown	Normal lung	USA
GSE43458	GSM1062821	GPL6244	unknown	unknown	unknown	unknown	Normal lung	USA
GSE43458	GSM1062822	GPL6244	unknown	unknown	unknown	unknown	Normal lung	USA
GSE43458	GSM1062823	GPL6244	unknown	unknown	unknown	unknown	Normal lung	USA
GSE43458	GSM1062824	GPL6244	unknown	unknown	unknown	unknown	Normal lung	USA
GSE43458	GSM1062825	GPL6244	unknown	unknown	unknown	unknown	Normal lung	USA
GSE43458	GSM1062826	GPL6244	unknown	unknown	unknown	unknown	Normal lung	USA
GSE43458	GSM1062827	GPL6244	unknown	unknown	unknown	unknown	Normal lung	USA
GSE43458	GSM1062828	GPL6244	unknown	unknown	unknown	unknown	Normal lung	USA
GSE43458	GSM1062829	GPL6244	unknown	unknown	unknown	unknown	Normal lung	USA
GSE43458	GSM1062830	GPL6244	unknown	unknown	unknown	unknown	Normal lung	USA
GSE43458	GSM1062831	GPL6244	unknown	unknown	unknown	unknown	Normal lung	USA
GSE43458	GSM1062832	GPL6244	unknown	unknown	unknown	unknown	Normal lung	USA
GSE43458	GSM1062833	GPL6244	unknown	unknown	unknown	unknown	Normal lung	USA
GSE43458	GSM1062834	GPL6244	unknown	unknown	unknown	unknown	Normal lung	USA
GSE43458	GSM1062835	GPL6244	unknown	unknown	unknown	unknown	Lung tumor	USA
GSE43458	GSM1062836	GPL6244	unknown	unknown	unknown	unknown	Lung tumor	USA
GSE43458	GSM1062837	GPL6244	unknown	unknown	unknown	unknown	Lung tumor	USA
GSE43458	GSM1062838	GPL6244	unknown	unknown	unknown	unknown	Lung tumor	USA
GSE43458	GSM1062839	GPL6244	unknown	unknown	unknown	unknown	Lung tumor	USA
GSE43458	GSM1062840	GPL6244	unknown	unknown	unknown	unknown	Lung tumor	USA
GSE43458	GSM1062841	GPL6244	unknown	unknown	unknown	unknown	Lung tumor	USA
GSE43458	GSM1062842	GPL6244	unknown	unknown	unknown	unknown	Lung tumor	USA
GSE43458	GSM1062843	GPL6244	unknown	unknown	unknown	unknown	Lung tumor	USA
GSE43458	GSM1062844	GPL6244	unknown	unknown	unknown	unknown	Lung tumor	USA
GSE43458	GSM1062845	GPL6244	unknown	unknown	unknown	unknown	Lung tumor	USA
GSE43458	GSM1062846	GPL6244	unknown	unknown	unknown	unknown	Lung tumor	USA
GSE43458	GSM1062847	GPL6244	unknown	unknown	unknown	unknown	Lung tumor	USA
GSE43458	GSM1062848	GPL6244	unknown	unknown	unknown	unknown	Lung tumor	USA
GSE43458	GSM1062849	GPL6244	unknown	unknown	unknown	unknown	Lung tumor	USA
GSE43458	GSM1062850	GPL6244	unknown	unknown	unknown	unknown	Lung tumor	USA
GSE43458	GSM1062851	GPL6244	unknown	unknown	unknown	unknown	Lung tumor	USA
GSE43458	GSM1062852	GPL6244	unknown	unknown	unknown	unknown	Lung tumor	USA
GSE43458	GSM1062853	GPL6244	unknown	unknown	unknown	unknown	Lung tumor	USA
GSE43458	GSM1062854	GPL6244	unknown	unknown	unknown	unknown	Lung tumor	USA
GSE43458	GSM1062855	GPL6244	unknown	unknown	unknown	unknown	Lung tumor	USA
GSE43458	GSM1062856	GPL6244	unknown	unknown	unknown	unknown	Lung tumor	USA
GSE43458	GSM1062857	GPL6244	unknown	unknown	unknown	unknown	Lung tumor	USA
GSE43458	GSM1062858	GPL6244	unknown	unknown	unknown	unknown	Lung tumor	USA
GSE43458	GSM1062859	GPL6244	unknown	unknown	unknown	unknown	Lung tumor	USA
GSE43458	GSM1062860	GPL6244	unknown	unknown	unknown	unknown	Lung tumor	USA
GSE43458	GSM1062861	GPL6244	unknown	unknown	unknown	unknown	Lung tumor	USA
GSE43458	GSM1062862	GPL6244	unknown	unknown	unknown	unknown	Lung tumor	USA
GSE43458	GSM1062863	GPL6244	unknown	unknown	unknown	unknown	Lung tumor	USA
GSE43458	GSM1062864	GPL6244	unknown	unknown	unknown	unknown	Lung tumor	USA
GSE43458	GSM1062865	GPL6244	unknown	unknown	unknown	unknown	Lung tumor	USA
GSE43458	GSM1062866	GPL6244	unknown	unknown	unknown	unknown	Lung tumor	USA
GSE43458	GSM1062867	GPL6244	unknown	unknown	unknown	unknown	Lung tumor	USA
GSE43458	GSM1062868	GPL6244	unknown	unknown	unknown	unknown	Lung tumor	USA
GSE43458	GSM1062869	GPL6244	unknown	unknown	unknown	unknown	Lung tumor	USA
GSE43458	GSM1062870	GPL6244	unknown	unknown	unknown	unknown	Lung tumor	USA
GSE43458	GSM1062871	GPL6244	unknown	unknown	unknown	unknown	Lung tumor	USA
GSE43458	GSM1062872	GPL6244	unknown	unknown	unknown	unknown	Lung tumor	USA
GSE43458	GSM1062873	GPL6244	unknown	unknown	unknown	unknown	Lung tumor	USA
GSE43458	GSM1062874	GPL6244	unknown	unknown	unknown	unknown	Lung tumor	USA
GSE62113	GSM1519835	GPL14951	unknown	unknown	unknown	unknown	normal adjacent tissue	Canada
GSE62113	GSM1519836	GPL14951	unknown	unknown	unknown	unknown	normal adjacent tissue	Canada
GSE62113	GSM1519837	GPL14951	unknown	unknown	unknown	unknown	normal adjacent tissue	Canada
GSE62113	GSM1519838	GPL14951	unknown	unknown	unknown	unknown	normal adjacent tissue	Canada
GSE62113	GSM1519839	GPL14951	unknown	unknown	unknown	unknown	normal adjacent tissue	Canada
GSE62113	GSM1519840	GPL14951	unknown	unknown	unknown	unknown	normal adjacent tissue	Canada
GSE62113	GSM1519841	GPL14951	unknown	unknown	unknown	unknown	normal adjacent tissue	Canada
GSE62113	GSM1519842	GPL14951	unknown	unknown	unknown	unknown	normal adjacent tissue	Canada
GSE62113	GSM1519843	GPL14951	unknown	unknown	unknown	unknown	normal adjacent tissue	Canada
GSE62113	GSM1519844	GPL14951	unknown	unknown	unknown	unknown	primary tumor	Canada
GSE62113	GSM1519845	GPL14951	unknown	unknown	unknown	unknown	primary tumor	Canada
GSE62113	GSM1519846	GPL14951	unknown	unknown	unknown	unknown	primary tumor	Canada
GSE62113	GSM1519847	GPL14951	unknown	unknown	unknown	unknown	primary tumor	Canada
GSE62113	GSM1519848	GPL14951	unknown	unknown	unknown	unknown	primary tumor	Canada
GSE62113	GSM1519849	GPL14951	unknown	unknown	unknown	unknown	primary tumor	Canada
GSE62113	GSM1519850	GPL14951	unknown	unknown	unknown	unknown	primary tumor	Canada
GSE62113	GSM1519851	GPL14951	unknown	unknown	unknown	unknown	primary tumor	Canada
GSE62113	GSM1519852	GPL14951	unknown	unknown	unknown	unknown	primary tumor	Canada
GSE62113	GSM1519853	GPL14951	unknown	unknown	unknown	unknown	primary tumor	Canada
GSE62113	GSM1519854	GPL14951	unknown	unknown	unknown	unknown	xenograft	Canada
GSE62113	GSM1519855	GPL14951	unknown	unknown	unknown	unknown	xenograft	Canada
GSE62113	GSM1519856	GPL14951	unknown	unknown	unknown	unknown	xenograft	Canada
GSE62113	GSM1519857	GPL14951	unknown	unknown	unknown	unknown	xenograft	Canada
GSE62113	GSM1519858	GPL14951	unknown	unknown	unknown	unknown	xenograft	Canada
GSE62113	GSM1519859	GPL14951	unknown	unknown	unknown	unknown	xenograft	Canada
GSE62113	GSM1519860	GPL14951	unknown	unknown	unknown	unknown	xenograft	Canada
GSE62113	GSM1519861	GPL14951	unknown	unknown	unknown	unknown	xenograft	Canada
GSE62113	GSM1519862	GPL14951	unknown	unknown	unknown	unknown	xenograft	Canada
GSE62113	GSM1519863	GPL14951	unknown	unknown	unknown	unknown	xenograft	Canada
GSE62113	GSM1519864	GPL14951	unknown	unknown	unknown	unknown	xenograft	Canada
